# Supplementary material
Source: publisher figshare collection journal article supplement (https://sage.figshare.com/ndownloader/files/17797559)
Supplement: Supplementary file [file 17797559]

**Supplemental Figure 1.** Effect of combining anti-CD47 treatment with irradiation or TMZ chemotherapy on the macrophage-dependent phagocytosis of GBM *in vitro*. (A) GBM tumor cells were treated with Hu5F9-G4 (Hu5F9), 2- or 8-Gy irradiation (IR), or both and subjected to phagocytosis by PBMC-derived macrophages. (B) GBM tumor cells were treated with Hu5F9-G4 (Hu5F9), 0, 25, and 500  $\mu$ M TMZ, or both and subjected to phagocytosis by PBMC-derived macrophages. Control = non-binding IgG<sub>4</sub> alone, and DMSO at the same concentration the TMZ was diluted in. Data are presented as percentage of macrophages that had phagocytosed tumors as determine by flow cytometry.
